# Supplementary material
Source: publisher figshare collection journal article supplement (https://sage.figshare.com/ndownloader/files/36009533)
Supplement: Supplementary file 1 [file 36009533]

|  | | Males | | Females | |
| --- | --- | --- | --- | --- | --- |
| Measurement | Origin | Cambodian | Chinese | Cambodian | Chinese |
| Adrenal glands (g) | Chinese | 0.0279 | - | 0.0122 | - |
| Vietnamese | -0.0064 | -0.0343 | 0.00672 | -0.00552 |
| Adrenal glands / Body Weight (%)b | Chinese | 0.000388 | - | 0.000464 | - |
| Vietnamese | -0.00101 [0.0300] | -0.0014 [0.0300] | -0.000719 | -0.00118 [0.0060] |
| Adrenal glands / Brain Weight (ratio) | Chinese | 0.000371 | - | 0.000138 | - |
| Vietnamese | -7.09e-05 | -0.000442 | 0.000232 | 9.41e-05 |
| Brain (g)b | Chinese | 0.000345 | - | 0.456 | - |
| Vietnamese | -0.324 | -0.324 | -0.958 | -1.41 [0.0120] |
| Brain / Body Weight (%)a,b | Chinese | -0.092 [0.0120] | - | 0.0059 | - |
| Vietnamese | -0.127 [<0.0001] | -0.0349 | -0.165 [<0.0001] | -0.171 [<0.0001] |
| Heart (g)a,b | Chinese | 0.692 [<0.0001] | - | 0.521 [<0.0001] | - |
| Vietnamese | 0.571 [0.0150] | -0.121 | 1.16 [<0.0001] | 0.638 [<0.0001] |
| Heart / Body Weight (%)a,b | Chinese | 0.0139 [<0.0001] | - | 0.0203 [<0.0001] | - |
| Vietnamese | 0.0104 [0.0060] | -0.00346 | 0.0252 [<0.0001] | 0.00485 |
| Heart / Brain Weight (ratio)a,b | Chinese | 0.0101 [<0.0001] | - | 0.00703 [<0.0001] | - |
| Vietnamese | 0.00894 [0.0030] | -0.00119 | 0.0202 [<0.0001] | 0.0132 [<0.0001] |
| Kidneys (g) | Chinese | 0.174 | - | 0.0572 | - |
| Vietnamese | -0.326 | -0.5 | 0.153 | 0.0954 |
| Kidneys / Body Weight (%)a,b | Chinese | -0.00834 | - | 0.00277 | - |
| Vietnamese | -0.0255 [<0.0001] | -0.0172 [<0.0001] | -0.0154 [0.0180] | -0.0182 [<0.0001] |
| Kidneys / Brain Weight (ratio) | Chinese | 0.00276 | - | -0.000785 | - |
| Vietnamese | -0.00373 | -0.00649 | 0.00546 | 0.00624 |
| Liver (g) | Chinese | 0.805 | - | 0.489 | - |
| Vietnamese | 0.287 | -0.519 | 1.71 | 1.22 |
| Liver / Body Weight (%)b | Chinese | -0.0364 [0.0300] | - | 0.0183 | - |
| Vietnamese | -0.0488 [0.0480] | -0.0124 | -0.0408 | -0.0591 [0.0060] |
| Liver / Brain Weight (ratio) | Chinese | 0.0122 | - | 0.000488 | - |
| Vietnamese | 0.00871 | -0.00346 | 0.0392 | 0.0387 [0.0240] |
| Lung (g)a,b | Chinese | -3.12 [<0.0001] | - | -3.53 [<0.0001] | - |
| Vietnamese | -4.56 [<0.0001] | -1.43 [0.0060] | -4.06 [<0.0001] | -0.535 |
| Lung / Body Weight (%)a,b | Chinese | -0.177 [<0.0001] | - | -0.154 [<0.0001] | - |
| Vietnamese | -0.24 [<0.0001] | -0.0624 [<0.0001] | -0.205 [<0.0001] | -0.0503 [0.0020] |
| Lung / Brain Weight (ratio)a,b | Chinese | -0.0471 [<0.0001] | - | -0.0595 [<0.0001] | - |
| Vietnamese | -0.0696 [<0.0001] | -0.0225 [0.0040] | -0.0673 [<0.0001] | -0.00777 |
| Pancreas (g)a | Chinese | 1.97 [0.0120] | - | 1.23 [0.0420] | - |
| Vietnamese | 0.791 | -1.18 | 0.946 | -0.282 |
| Pancreas / Body Weight (%) | Chinese | 0.0195 | - | -0.0076 | - |
| Vietnamese | 0.0102 | -0.00925 | 0.00606 | 0.0137 |
| Pancreas / Brain Weight (ratio) | Chinese | 0.0215 [0.0420] | - | 0.0135 | - |
| Vietnamese | 0.0122 | -0.00925 | 0.00894 | -0.00458 |
| Pituitary gland (g) | Chinese | -0.00106 | - | -0.00109 | - |
| Vietnamese | -0.001 | 5.83e-05 | 0.0015 | 0.00259 |
| Pituitary gland / Body Weight (%) | Chinese | -7.03e-05 | - | -3.4e-05 | - |
| Vietnamese | -6.72e-05 | 3.12e-06 | -3.67e-05 | -2.66e-06 |
| Pituitary gland / Brain Weight (ratio) | Chinese | -1.19e-05 | - | -1.89e-05 | - |
| Vietnamese | -9.48e-06 | 2.4e-06 | 3.86e-05 | 5.75e-05 |
| Salivary Gland, Mandibular (g)a,b | Chinese | 0.127 [0.0090] | - | 0.178 [<0.0001] | - |
| Vietnamese | 0.00782 | -0.119 [0.0060] | 0.0997 [0.0300] | -0.0787 |
| Salivary Gland, Mandibular / Body Weight (%)a,b | Chinese | 0.00332 | - | 0.00676 [<0.0001] | - |
| Vietnamese | -0.000156 | -0.00348 [0.0300] | 0.00301 [0.0180] | -0.00375 [0.0180] |
| Salivary Gland, Mandibular / Brain Weight (ratio)a,b | Chinese | 0.00177 [0.0150] | - | 0.00242 [<0.0001] | - |
| Vietnamese | 6.56e-05 | -0.0017 [0.0150] | 0.00143 [0.0420] | -0.00099 |
| Spleen (g)b | Chinese | -0.11 | - | -0.246 [<0.0001] | - |
| Vietnamese | -0.256 | -0.147 | -0.464 [<0.0001] | -0.217 [0.0320] |
| Spleen / Body Weight (%)a,b | Chinese | -0.00811 [0.0090] | - | -0.00966 [<0.0001] | - |
| Vietnamese | -0.0119 [0.0060] | -0.00377 | -0.0225 [<0.0001] | -0.0128 [<0.0001] |
| Spleen / Brain Weight (ratio)b | Chinese | -0.0013 | - | -0.00426 [<0.0001] | - |
| Vietnamese | -0.00333 | -0.00203 | -0.00654 [<0.0001] | -0.00228 |
| Thymus (g)a,b | Chinese | -0.35 [0.0030] | - | -0.15 | - |
| Vietnamese | 0.306 | 0.655 [<0.0001] | 0.287 | 0.436 [<0.0001] |
| Thymus / Body Weight (%)a,b | Chinese | -0.0181 [<0.0001] | - | -0.00701 [0.0270] | - |
| Vietnamese | 0.00389 | 0.022 [<0.0001] | 0.00484 | 0.0118 [0.0270] |
| Thymus / Brain Weight (ratio)a,b | Chinese | -0.00473 [0.0030] | - | -0.00274 [0.0200] | - |
| Vietnamese | 0.0049 [0.0480] | 0.00962 [<0.0001] | 0.00514 [0.0200] | 0.00787 [<0.0001] |
| Thyroid/parathyroid glands (g)a | Chinese | 0.033 [<0.0001] | - | 0.00396 | - |
| Vietnamese | 0.0287 | -0.00434 | -0.0051 | -0.00906 |
| Thyroid/parathyroid glands / Body Weight (%) | Chinese | 0.000795 [0.0180] | - | 0.000163 | - |
| Vietnamese | 0.000713 | -8.15e-05 | -0.000847 | -0.00101 [0.0480] |
| Thyroid/parathyroid glands / Brain Weight (ratio)a,b | Chinese | 0.00051 [<0.0001] | - | 1.97e-05 | - |
| Vietnamese | 0.000476 | -3.38e-05 | -8.03e-06 | -2.77e-05 |
